# Supplementary material for: Occurrence and Distribution Patterns of Plum Tree Viruses and Genetic Diversity of Sharka Isolates in Bosnia and Herzegovina
Source: MDPI journal article supplement (doi:10.3390/horticulturae8090783), 2022-08-28
Supplement: s1 [file s1]

**Supplementary Table S2.** The RT-PCR results for the detection of PPV, PPV-D, PPV-M and PPV-REC in Bosnia and Herzegovina. Detection of PPV was conducted using the universal primer P1/P5. Information is provided for single sample from each orchard, stating the geographical region of the orchard and cultivar. Positive samples (+), negative samples (-). The samples in which PPV was previously confirmed by ELISA are gray shaded.

| Orchard   | Region    | Sample number | Cultivar    | PPV | PPV-D | PPV-M | PPV-REC |
|-----------|-----------|---------------|-------------|-----|-------|-------|---------|
| Orašac O7 | Northwest | O7/1          | Požegača    | +   | +     | -     | -       |
|           |           | O7/46         | Požegača    | +   | +     | -     | -       |
|           |           | O7/49         | Požegača    | +   | +     | -     | +       |
|           |           | O7/50         | Požegača    | +   | -     | -     | +       |
|           |           | O7/59         | Požegača    | +   | +     | -     | +       |
|           |           | O7/68         | Požegača    | +   | +     | -     | +       |
|           |           | O7/79         | Požegača    | +   | -     | -     | -       |
|           |           | O7/80         | Požegača    | +   | +     | -     | -       |
|           |           | O7/80-2       | Požegača    | +   | +     | -     | -       |
|           |           | O7/81         | Požegača    | +   | +     | -     | -       |
|           |           | O7/81-2       | Požegača    | +   | -     | -     | -       |
|           |           | O7/83         | Požegača    | +   | -     | -     | -       |
| Orašac C  | Northwest | C2            | Požegača    | +   | -     | -     | -       |
|           |           | C3            | Požegača    | +   | +     | -     | -       |
|           |           | C4            | Požegača    | +   | -     | -     | -       |
|           |           | C6            | Požegača    | +   | -     | -     | -       |
|           |           | C9            | Požegača    | -   | -     | -     | -       |
|           |           | LCS           | Požegača    | +   | -     | -     | -       |
|           |           | LC2           | Požegača    | -   | -     | -     | -       |
| Kozlovac  | Northeast | K+            | Stanley     | +   | +     | -     | -       |
|           |           | K3            | Stanley     | +   | -     | -     | -       |
|           |           | K4            | Stanley     | +   | -     | -     | +       |
|           |           | K6            | Stanley     | +   | +     | -     | -       |
|           |           | KŠ            | Stanley     | -   | -     | -     | -       |
| Mionica 1 | Northeast | G2            | Č. Lepotica | +   | -     | -     | -       |
|           |           | G3            | Č. Lepotica | +   | -     | -     | -       |
|           |           | G4            | Č. Lepotica | +   | -     | -     | -       |
|           |           | G5            | Č. Lepotica | -   | -     | -     | -       |
|           |           | G6            | Stanley     | +   | -     | -     | +       |
|           |           | G7            | Stanley     | +   | -     | -     | -       |
|           |           | G8            | Stanley     | +   | -     | -     | -       |
|           |           | G10           | Stanley     | +   | +     | -     | -       |
|           |           | G15           | Stanley     | +   | -     | -     | -       |
| Mionica 2 | Northeast | R1            | Č. Lepotica | -   | -     | -     | -       |
|           |           | R2            | Č. Lepotica | -   | -     | -     | -       |
|           |           | R3            | Č. Lepotica | +   | -     | -     | -       |
|           |           | R4            | Č. Lepotica | +   | -     | -     | -       |
|           |           | R5            | Č. Lepotica | +   | -     | -     | -       |
|           |           | R7            | Č. Lepotica | +   | -     | -     | -       |
|           |           | R8            | Č. Lepotica | +   | -     | -     | -       |
|           |           | R10           | Č. Lepotica | -   | -     | -     | -       |
|           |           | R12           | Č. Lepotica | +   | -     | -     | -       |
|           |           | R13           | Č. Lepotica | +   | +     | -     | -       |
|           |           | R14           | Č. Lepotica | +   | -     | -     | -       |
|           |           | R15           | Č. lepotica | -   | -     | -     | -       |
