# Supplementary material for: Occurrence and Distribution Patterns of Plum Tree Viruses and Genetic Diversity of Sharka Isolates in Bosnia and Herzegovina
Source: MDPI journal article supplement (doi:10.3390/horticulturae8090783), 2022-08-28
Supplement: s1 [file s1]

**Supplementary Table S1.** ELISA results for detection of PPV, PNRSV, and PDV in Bosnia and Herzegovina. Information on cultivars, number of samples collected, and numerical summary of infected samples and infection incidences are presented for each orchard. For clarity of data, only viruses that tested positive are presented.

| Locality and orchard code | Cultivar     | Number of samples | Infected samples (numerically)/ infection incidence (%) | Individual virus infection (numerically/ Infection incidence in %) |                          |                           | Total number of infected samples/ total infection incidence (%) |
|---------------------------|--------------|-------------------|---------------------------------------------------------|--------------------------------------------------------------------|--------------------------|---------------------------|-----------------------------------------------------------------|
|                           |              |                   |                                                         | PPV                                                                | PNRSV                    | PDV                       |                                                                 |
| Orašac - 01               | Požegača     | 31                | 14<br>45.16%                                            | 14<br>45.16%                                                       | 0                        | 0                         | 14<br>45.16%                                                    |
| Orašac - 02               | Požegača     | 23                | 13<br>56.52%                                            | 13<br>56.52%                                                       | 0                        | 0                         | 13<br>56.52%                                                    |
| Orašac - 03               | Požegača     | 14                | 6<br>42.86%                                             | 6<br>42.86%                                                        | 0                        | 0                         | 6<br>42.86%                                                     |
| Orašac - 04               | Požegača     | 46                | 23<br>50.00%                                            | 22<br>47.83%                                                       | 0                        | 1<br>2.17%                | 23<br>50.00%                                                    |
| Orašac - 05               | Požegača     | 30                | 16<br>53.33%                                            | 15<br>50.00%                                                       | 0                        | 1<br>3.33%                | 16<br>53.33%                                                    |
| Orašac - 06               | Požegača     | 19                | 10<br>52.63%                                            | 10<br>52.63%                                                       | 0                        | 0                         | 10<br>52.63%                                                    |
| Orašac - 07               | Požegača     | 109               | 72<br>66.05%                                            | 64<br>58.72%                                                       | 0                        | 8<br>7.34%                | 72<br>66.05%                                                    |
| Orašac - S                | Savka        | 19                | 4<br>21.05%                                             | 2<br>10.53%                                                        | 1<br>5.26                | 1<br>5.26%                | 5<br>20.83%                                                     |
|                           | Trnovača     | 5                 | 1<br>20.00%                                             | 1<br>20.00%                                                        | 0                        | 0                         |                                                                 |
| Halilagići-H              | Č.lepotica   | 18                | 8<br>44.44%                                             | 8<br>44.44%                                                        | 0                        | 0                         | 38<br>35.85%                                                    |
|                           | Stanley      | 41                | 12<br>29.27%                                            | 11<br>26.83%                                                       | 0                        | 1<br>2.44%                |                                                                 |
|                           | Č. rana      | 14                | 1<br>7.14%                                              | 1<br>7.14%                                                         | 0                        | 0                         |                                                                 |
|                           | Č. rodna     | 27                | 13<br>48.15                                             | 13<br>48.15%                                                       | 0                        | 0                         |                                                                 |
|                           | Č. šećer     | 6                 | 4<br>66.66%                                             | 4<br>66.66%                                                        | 0                        | 0                         |                                                                 |
| Izačić -IZ                | Požegača     | 13                | 12<br>92.31%                                            | 11<br>84.1%                                                        | 0                        | 1<br>7.69%                | 12<br>92.31%                                                    |
| Tešanj - T1               | Stanley      | 9                 | 3<br>33.33%                                             | 3<br>33.33%                                                        | 0                        | 0                         | 4<br>36.36%                                                     |
|                           | Kaorka       | 2                 | 1<br>50.00%                                             | 1<br>50.00%                                                        | 0                        | 0                         |                                                                 |
| Tešanj - T2               | Mađarica     | 5                 | 5<br>100.00%                                            | 4<br>80.00%                                                        | 0                        | 1<br>20.00%               | 5<br>100.00                                                     |
| Tešanj - T3               | Mađarica     | 25                | 21<br>84.00%                                            | 21<br>84.00%                                                       | 0                        | 0                         | 21<br>84.00                                                     |
| Tešanj - T4               | Požegača     | 4                 | 2<br>50%                                                | 2<br>50%                                                           | 0                        | 0                         | 2<br>20,0%                                                      |
|                           | Mađarica     | 3                 | 0                                                       | 0                                                                  | 0                        | 0                         |                                                                 |
|                           | Kaorka       | 1                 | 0                                                       | 0                                                                  | 0                        | 0                         |                                                                 |
|                           | Reine-Claude | 1                 | 0                                                       | 0                                                                  | 0                        | 0                         |                                                                 |
|                           | Stanley      | 1                 | 0                                                       | 0                                                                  | 0                        | 0                         |                                                                 |
| Mionica - M               | Č.lepotica   | 2                 | 2<br>100%                                               | 2<br>100                                                           | 0                        | 0                         | 2<br>100%                                                       |
| <b>TOTAL</b>              |              | <b>468</b>        | <b>243</b><br><b>51.92%</b>                             | <b>228</b><br><b>48.72%</b>                                        | <b>1</b><br><b>0.21%</b> | <b>14</b><br><b>2.99%</b> | <b>243</b><br><b>51.92%</b>                                     |
